# Supplementary material for: Ancestral SARS-CoV-2-specific T cells cross-recognize the Omicron variant
Source: PubMed Central journal article supplement (PMC8938268; doi:10.1038/s41591-022-01700-x), 2022-01-14
Supplement: 41591_2022_1700_MOESM1_ESM.pdf [file 41591_2022_1700_MOESM1_ESM.pdf]

---

**Supplementary information**

---

**Ancestral SARS-CoV-2-specific T cells cross-recognize the Omicron variant**

---

In the format provided by the authors and unedited

**Supplementary Table 1.** Cohort summary.

|                                           | <b>Vaccinated<br/>(<i>n</i> = 40)</b> | <b>Convalescent<br/>(mild, <i>n</i> = 26)</b> | <b>Convalescent<br/>(severe, <i>n</i> = 22)</b> | <b>Seronegative<br/>(<i>n</i> = 48)</b> |
|-------------------------------------------|---------------------------------------|-----------------------------------------------|-------------------------------------------------|-----------------------------------------|
| Age (years)                               |                                       |                                               |                                                 |                                         |
| Median                                    | 53                                    | 54                                            | 58                                              | NA                                      |
| Range                                     | 22–79                                 | 44–68                                         | 33–66                                           | NA                                      |
| Sex                                       |                                       |                                               |                                                 |                                         |
| Male                                      | 17 (43%)                              | 18 (69%)                                      | 19 (86%)                                        | NA                                      |
| Female                                    | 23 (58%)                              | 8 (31%)                                       | 3 (14%)                                         | NA                                      |
| Required intensive care                   | 0                                     | 0                                             | 14 (64%)                                        | 0                                       |
| Spike-specific antibodies at recruitment* | ND                                    | **                                            | **                                              | ND                                      |

\*Measured using an anti-SARS-CoV-2 S Immunoassay. \*\*Infections confirmed by RT-PCR for SARS-CoV-2. NA, not available; ND, not detected.

**Supplementary Table 2.** Flow cytometry reagents.

| <b>Antigen</b> | <b>Clone</b> | <b>Fluorophore</b> | <b>Company</b>  | <b>Panel</b>            | <b>Catalogue No.</b> | <b>Dilution</b>                     |
|----------------|--------------|--------------------|-----------------|-------------------------|----------------------|-------------------------------------|
| Viability      | -            | Fixable Aqua       | Thermo Fisher   | surface + intracellular | L34957               | 3:5000                              |
| CCR7           | G043H7       | APC-Cy7            | BioLegend       | surface + intracellular | 353212               | 1:50                                |
| CD3            | UCHT1        | BUV805             | BD Biosciences  | surface + intracellular | 612895               | Surface 1:50<br>Intracellular 1:250 |
| CD4            | SK3          | BUV496             | BD Biosciences  | surface + intracellular | 612936               | 1:25                                |
| CD8            | RPA-T8       | BUV395             | BD Biosciences  | surface + intracellular | 563795               | 1:250                               |
| CD14           | M5E2         | BV510              | BioLegend       | surface + intracellular | 301842               | 1:100                               |
| CD19           | HIB19        | BV510              | BioLegend       | surface + intracellular | 302242               | 1:100                               |
| CD45RA         | HI100        | BV570              | BioLegend       | surface + intracellular | 304132               | 1:200                               |
| CD137          | 4B4-1        | PE-Cy7             | BioLegend       | surface + intracellular | 309818               | Surface 1:25<br>Intracellular 1:100 |
| CD154          | 24-31        | BV421              | BioLegend       | surface + intracellular | 310824               | 1:25                                |
| CD194          | 1G1          | BB700              | BD Biosciences  | surface + intracellular | 566475               | 1:50                                |
| CD196          | 11A9         | BUV737             | BD Biosciences  | surface + intracellular | 612780               | 1:500                               |
| CXCR5          | RF8B2        | BB515              | BD Biosciences  | surface + intracellular | 564624               | 1:100                               |
| CD40           | HB14         | Unconjugated       | Miltenyi Biotec | surface                 | 130-094-133          | 1:200                               |
| CD69           | FN50         | BV650              | BioLegend       | surface                 | 310934               | 1:50                                |
| CXCR3          | G025H7       | AF647              | BioLegend       | surface                 | 353712               | 1:200                               |
| CD69           | FN50         | BUV563             | BD Biosciences  | intracellular           | 748764               | 1:200                               |
| CD107a         | H4A3         | BV785              | BioLegend       | Intracellular           | 328644               | 1:500                               |
| CXCR3          | 1C6          | BV750              | BD Biosciences  | intracellular           | 746895               | 1:50                                |
| GrzB           | GB11         | BB790              | BD Biosciences  | intracellular           | 624296               | 1:500                               |
| IFN- $\gamma$  | B27          | PE                 | BioLegend       | intracellular           | 506507               | 1:400                               |
| IL-2           | MQ1-17H12    | PE-Dazzle594       | BioLegend       | intracellular           | 500344               | 3:100                               |
| PD-1           | EH12.2H7     | BV711              | BioLegend       | intracellular           | 329928               | 1:25                                |
| TNF            | MAb11        | BV650              | BD Biosciences  | intracellular           | 563418               | 3:500                               |
